# Supplementary material
Source: PubMed Central journal article supplement (PMC6035074)
Supplement: NIHMS967453-supplement-1.pdf [file NIHMS967453-supplement-1.pdf]

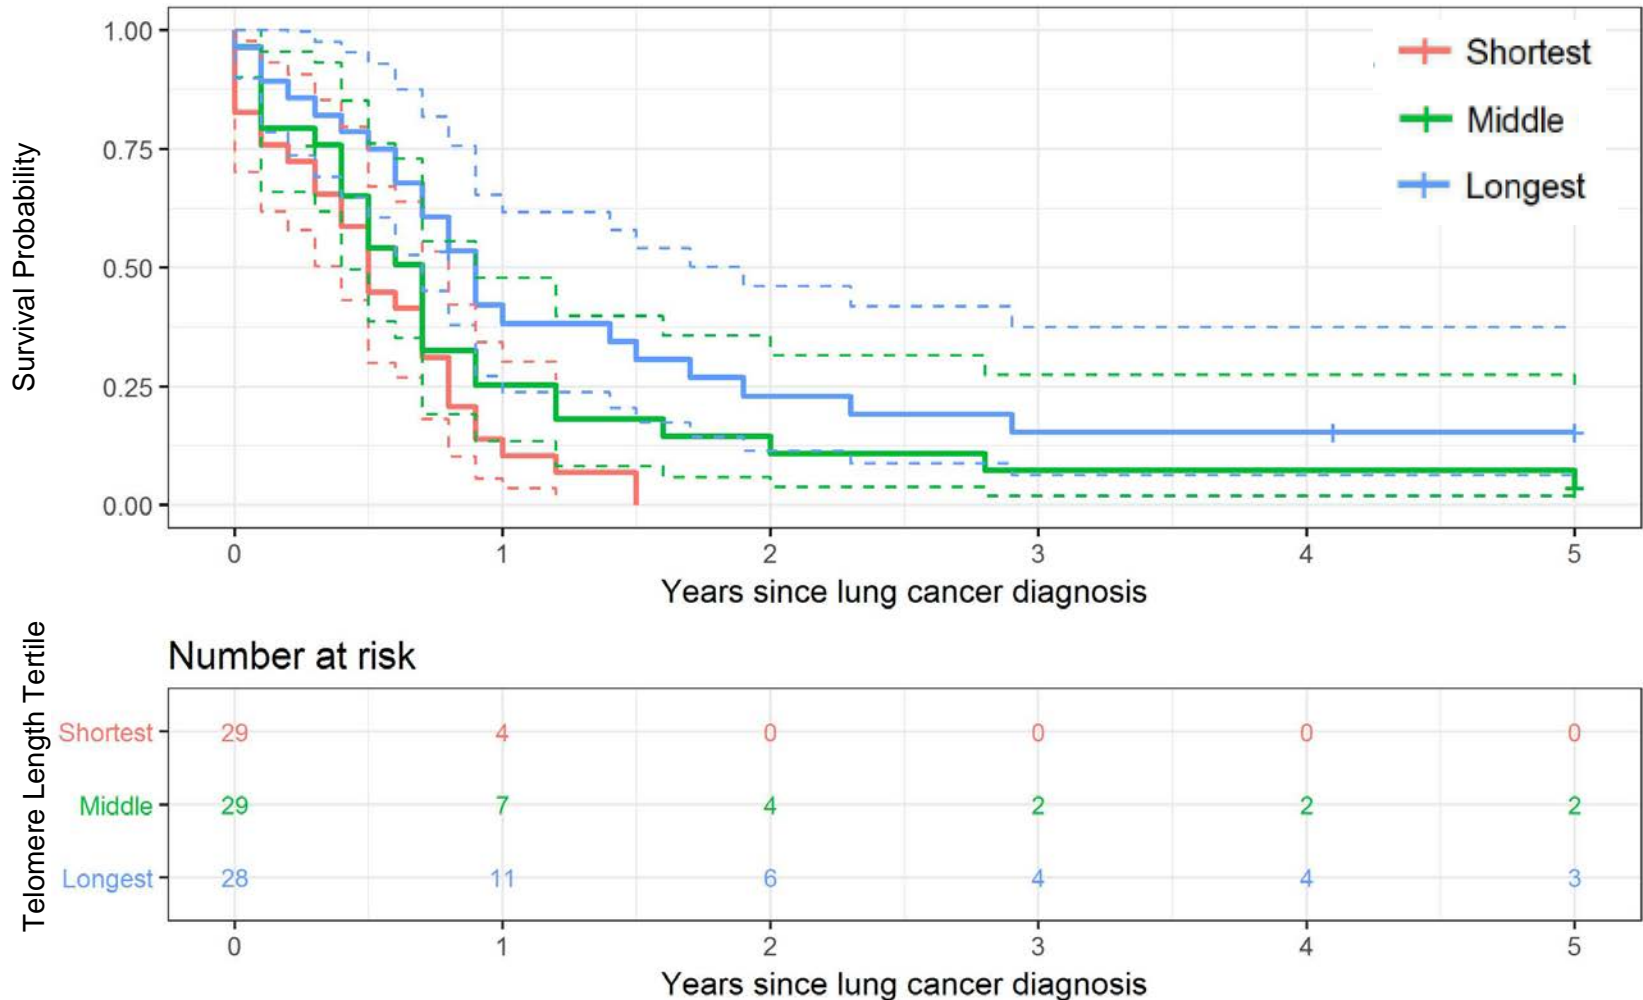

**Supplementary Figure S1.** Kaplan-Meier survival curves for stage III/IV SCLC-specific mortality by telomere length tertile (log-rank  $p=0.005$ ). Dotted lines represent 95% confidence boundaries per tertile. Median survival for the shortest tertile is only 6 months, compared to 10.8 months ( $p=0.008$ ) in the longest tertile.
